# Supplementary material for: Narratives of epistemic agency in citizen science classification projects: ideals of science and roles of citizens
Source: Springer Nature journal article supplement (doi:10.1007/s00146-022-01428-9), 2022-03-26
Supplement: MOESM2 [file 20260976]

## References of the sources used for the metasummaries –

Appendix 2 to *Narratives of Epistemic Agency in Citizen Science Classification Projects: Ideals of Science and Roles of Citizens*.

Submitted to *AI & Society*.

Corresponding Author: Marisa Ponti, Department of Applied Information Technology, University of Gothenburg, Gothenburg, Sweden, marisa.ponti@ait.gu.se, ORCID ID: <http://orcid.org/0000-0003-4708-4048>

### Mindcontrol

Is the application active? N/A

#### Journal Articles:

Keshavan, A., Yeatman, J.D. and Rokem, A. 2019. Combining citizen science and deep learning to amplify expertise in neuroimaging. *Frontiers in Neuroinformatics*. **13**, pp.29. DOI: 10.3389/fninf.2019.00029.

Esteban, O., Blair, R.W., Nielson, D.M. et al. 2019. Crowdsourced MRI quality metrics and expert quality annotations for training of humans and machines. *Scientific Data*. **6** (article number 30). <https://doi.org/10.1038/s41597-019-0035-4>

Wiggins, A. and Wilbanks, J. 2019. The rise of citizen science in health and biomedical research. *The American Journal of Bioethics* .**19**(8), pp. 3-14. <https://doi.org/10.1080/15265161.2019.1619859>

Keshavan, A., Datta, E., McDonough, I M., Madan, C.R., Jordan, K. and Henry, R.G. 2018. Mindcontrol: A web application for brain segmentation quality control. *Neuroimage*. **170**, pp. 365-372. DOI: 10.1016/j.neuroimage.2017.03.055

Keshavan, A., Madan, C.R., Datta, E. and McDonough, I.A. 2017. Mindcontrol: Organize, quality control, annotate, edit, and collaborate on neuroimaging processing results. *Research Ideas and Outcomes*. **3**:e12276. <https://doi.org/10.3897/rio.3.e12276>

### A Shared Space and A Space for Sharing

Is the application active? N/A

#### Journal Articles:

Gupta, P., Kaushik, B., and Sunanda. 2020. Suicidal tendency on social media by using text mining. In: Singh, P., Sood, S., Kumar, Y., Paprzycki, M., Pljonkin, A., and Hong, W.C. eds. *Futuristic trends in networks and computing technologies*. FTNCT 2019. Communications in Computer and Information Science, vol 1206. Singapore: Springer. pp 256-263. DOI: [https://doi.org/10.1007/978-981-15-4451-4\\_20](https://doi.org/10.1007/978-981-15-4451-4_20)

Fahey, R.A, Matsubayashi, T., and Ueda, M. 2018. Tracking the Werther Effect on social media: Emotional responses to prominent suicide deaths on twitter and subsequent increases in suicide. *Soc Sci Med.* **219**, pp. 19-29. DOI:10.1016/j.socscimed.2018.10.004

Karamshuk, D, Shaw, F, Brownlie, J ad Sastry, N. 2017. Bridging big data and qualitative methods in the social sciences: A case study of Twitter responses to high profile deaths by suicide. *Online Social Networks and Media.* 1, pp. 33-43. <https://www.sciencedirect.com/science/article/pii/S2468696416300076>

Ueda, M., Mori, K., Matsubayashi, T., and Sawada, Y. 2017. Tweeting celebrity suicides: Users' reaction to prominent suicide deaths on Twitter and subsequent increases in actual suicides. *Soc Sci Med.* **189**, pp. 58-166. DOI: 10.1016/j.socscimed.2017.06.032

### **MAIA-Machine learning Assisted Image Annotation**

Is the application active? N/A

Journal Articles:

Zurowietz, M., Langenkämper, D., Hosking, B., Ruhl, H.A. and Nattkemper, T.W. 2018. MAIA—A machine learning assisted image annotation method for environmental monitoring and exploration. *PLoS ONE.* **13**(11): e0207498. DOI: <https://doi.org/10.1371/journal.pone.0207498>

### **SnapshotSerengeti.org**

Is the application active? Yes

Journal Articles:

Spiers, H., Swanson, A., Fortson, L., Simmons, B. D., Trouille, L., Blickhan, S., and Lintott, C. 2019. Everyone counts? Design considerations in online citizen science. *JCOM.* **18**(01), A04. DOI: <https://doi.org/10.22323/2.18010204>.

Muneza, A.B., Ortiz-Calo, W., Packer, C., Cusack, J.J., Jones, T., Palmer, M.S., Swanson, A., Kosmala, M., Dickman, A.J., Macdonald, D.W., and Montgomery, R.A. 2019. Quantifying the severity of giraffe skin disease via photogrammetry analysis of camera trap data. *Journal of wildlife diseases.* **55**:4, pp. 770-781. <https://doi.org/10.7589/2018-06-149>

Packer, C. 2019. The African lion: a long history of interdisciplinary research. *Frontiers in Ecology and Evolution.* **7**: 259. DOI: 10.3389/fevo.2019.00259

Yousif, H., Yuan, J., Kays, R., and He, Z. 2019. Animal scanner: software for classifying humans, animals, and empty frames in camera trap images. *Ecol Evol.* **9**, pp. 1578–1589. <https://doi.org/10.1002/ece3.4747>

Norouzzadeh, M.S., Nguyen, A., Kosmala, M., Swanson, A., Palmer, M.S., Packer, C., and Clune, J. 2018. Automatically identifying, counting, and describing wild animals in camera-trap images with deep learning. *Proceedings of the National Academy of Sciences*. **115**(25), E5716 E5725. DOI: 10.1073/pnas.1719367115

Swanson, A., Kosmala, M., Lintott, C., Simpson, R., Smith, A. and Packer, C. 2015. Snapshot Serengeti, high-frequency annotated camera trap images of 40 mammalian species in an African savanna. *Scientific Data*. 2:150026. DOI: 10.1038/sdata.2015.26

Other publications:

NeuroHive. 2018. Automated animal identification using deep learning techniques. [Online]. [Accessed 11 May 2020]. Available from: <https://medium.com/coinmonks/automated-animal-identification-using-deep-learning-techniques-41039f2a994d>

Snapshot Serengeti. 2019. *Machine learning update*. [Online]. [Accessed 11 May 2020]. Available from: <https://blog.snapshotserengeti.org/2019/03/14/machine-learning-update/>

### **Observation.org**

Is the application active? Yes

Journal Articles:

Hogeweg, L, Schermer, M, Pieterse, S, Roeke, T and Gerritsen, W. 2019. Machine learning model for identifying Dutch/Belgian biodiversity. *Biodiversity Information Science and Standards* 3: e39229. <https://doi.org/10.3897/biss.3.39229>

Schermer, M and Hogeweg, L. 2018. Supporting citizen scientists with automatic species identification using deep learning image recognition models. *Biodiversity Information Science and Standards*. 2: e25268. <https://doi.org/10.3897/biss.2.25268>

Troudet, J., Grandcolas, P., Blin, A. *et al.* 2017. Taxonomic bias in biodiversity data and societal preferences. *Sci Rep*. **7**, 9132. DOI: <https://doi.org/10.1038/s41598-017-09084-6>.

### **PlantSnap**

Is the application active? Yes

Journal Articles:

Other publications:

Steemit. 2018. *PlantSnap - Uses AI and machine-learning algorithm to identify plants*. [Online]. [Accessed 6 June 2020]. Available from: <https://steemit.com/steemhunt/@autofreak/plantsnap-uses-ai-and-machine-learning-algorithm-to-identify-plants>

Startengine.n.d. *PlantSnap reconnects people with the world around them*. [Online]. [Accessed 6 June 2020]. Available from: [https://www.startengine.com/plantsnap-inc?utm\\_source=ct&utm\\_medium=website&utm\\_campaign=interstitial](https://www.startengine.com/plantsnap-inc?utm_source=ct&utm_medium=website&utm_campaign=interstitial)

### **iNaturalist.org**

Is the application active? Yes

#### Journal Articles:

Van Horn, G. *et al.* 2018. The iNaturalist species classification and detection dataset. In: *Proceedings of the 2018 IEEE/CVF Conference on Computer Vision and Pattern Recognition*. Salt Lake City, UT. pp. 8769-8778. DOI: 10.1109/CVPR.2018.00914.

Heberling, J.M. and Isaac, B.L. 2018. iNaturalist as a tool to expand the research value of museum specimens. *Appl Plant Sci*. 2018 Nov 7;6(11):e01193. DOI: 10.1002/aps3.1193.

#### Other publications:

iNatForum. 2019. *Track and mark identifications made through "Agree?" buttons*. [Online]. [Accessed 11 May 2020]. Available from: <https://forum.inaturalist.org/t/track-and-mark-identifications-made-through-agree-buttons/243>

Gee, S. 2017. *iNaturalist launches deep learning-based identification app*. [Online]. [Accessed 11 May 2020]. Available from: <https://www.i-programmer.info/news/105-artificial-intelligence/10848-inaturalist.html/>

### **Milky Way**

Is the application active? N/A

#### Journal Articles:

Xu, D. and Offner, S. S.R. 2017. Assessing the performance of a machine learning algorithm in identifying bubbles in dust emission. *The Astrophysical Journal*. **851**(2), article id. 149, 12 pp. [Accessed 6 June 2020]. Available from: <https://ui.adsabs.harvard.edu/abs/2017ApJ...851..149X/abstract>

Beaumont, C.N., Goodman, A.A., Kendrew, S., Williams, J.P. and Simpson, R. 2014. The Milky Way project: leveraging citizen science and machine learning to detect interstellar bubbles. *The Astrophysical Journal Supplement Series* [Online]. **214**(3). [Accessed 18 June 2020]. Available from: <https://arxiv.org/pdf/1406.2692v1.pdf>

### **Human Protein Atlas**

Is the application active? Yes

Journal Articles:

Sullivan, D., Winsnes, C., Åkesson, L. *et al.* 2018. Deep learning is combined with massive-scale citizen science to improve large-scale image classification. *Nat Biotechnol.* **36**, 820–828 (2018). DOI: <https://doi.org/10.1038/nbt.4225>

**Microbiology Virus Spot**

Is the application active? Yes

Journal Articles:

Bruggemann, J., Lander, G.C., and Su, A.I. 2018. Exploring applications of crowdsourcing to cryo-EM. *Journal of Structural Biology.* 203 (1), 37-45.

Other publications:

Libberton, B. 2019. *Citizen scientists enlisted to spot viruses*. [Online]. [Accessed 25 June 2020]. Available from: <https://naturemicrobiologycommunity.nature.com/users/7272-ben-libberton/posts/44573-citizen-scientists-enlisted-to-spot-viruses>

Diamond Light Source. N.d. *Science Scribbler: Virus Factory*. [Online]. [Accessed 25 June 2020]. Available from:

<https://www.zooniverse.org/projects/markbasham/science-scribbler-virus-factory/about/research>

Zooniverse. n.d. *What are we researching?* [Online]. [Accessed 30 June 2020]. Available from: <https://www.zooniverse.org/projects/markbasham/science-scribbler-virus-factory/about/research>

**Galaxy Zoo AI**

Is the application active? Yes

Journal Articles:

Khan, A. *et al.* 2019. Deep learning at scale for the construction of galaxy catalogs in the Dark Energy Survey. *Physics Letters B*, 795: 248-258. DOI:

<https://doi.org/10.1016/j.physletb.2019.06.009>

Featured in <https://www.journals.elsevier.com/physics-letters-b/featured-articles/classifying-galaxies-with-ai-and-people-power> [Accessed October 5 2020].

Other publications:

Zooniverse. 2019, May 21. *Galaxy Zoo upgrade: better galaxies, better science*. Zooniverse Project Blog. [Online]. [Accessed 6 June 2020]. Available from: <https://blog.galaxyzoo.org/2019/05/21/galaxy-zoo-upgrade-better-galaxies-better-science/>

Peckham, O. 2019. *Scientists leverage HPC and AI to wrangle the Galaxy Zoo*. [Online]. [Accessed 19 June 2020]. Available from: <https://www.hpcwire.com/2019/07/08/scientists-leverage-hpc-and-ai-to-wrangle-the-galaxy-zoo/>

### **Multiple Sclerosis**

Is the application active? N/A

Journal Articles:

Tacchella, A., Romano, S., Ferraldeschi, M., Salvetti, M., Zaccaria, A., Crisanti, A., & Grassi, F. (2017). Collaboration between a human group and artificial intelligence can improve prediction of multiple sclerosis course: a proof-of-principle study. *F1000Research*, 6, 2172. <https://doi.org/10.12688/f1000research.13114.2>
